# Supplementary material
Source: HighWire-hosted journal article supplement (https://dmd.aspetjournals.org/content/suppl/2015/01/14/dmd.114.062620)
Supplement: supplemental_62620.pdf [file supplemental_62620.pdf]

DMD #062620

Supplemental Tables and Figures

**A long-standing mystery solved: The formation of 3-hydroxydesloratadine is catalyzed by CYP2C8 but prior glucuronidation of desloratadine by UGT2B10 is an obligatory requirement**

Faraz Kazmi, Joanna E. Barbara, Phyllis Yerino and Andrew Parkinson

XenoTech, LLC, Lenexa, KS, USA (F.K., J.E.B., P.Y.).

XPD Consulting, Shawnee, KS, USA (A.P).

Drug Metabolism and Disposition

**Supplemental Table 1: Individual human donor information for CYP2C8 correlation analysis.**

| Xenotech Liver Number | Gender | Age (years) | Ethnicity        |
|-----------------------|--------|-------------|------------------|
| H924                  | M      | 40          | Caucasian        |
| H954                  | M      | 55          | Caucasian        |
| H1008                 | M      | 36          | Hispanic         |
| H1039                 | M      | 61          | African American |
| H1042                 | M      | 51          | Caucasian        |
| H1059                 | F      | 21          | Caucasian        |
| H1086                 | M      | 63          | Caucasian        |
| H1135                 | F      | 54          | African American |
| H1141                 | F      | 20          | Asian            |

**Supplemental Figure 1: Formation of 5- and 6-hydroxydesloratadine in hepatocytes from mouse, rat, rabbit, dog, minipig, monkey and human.**

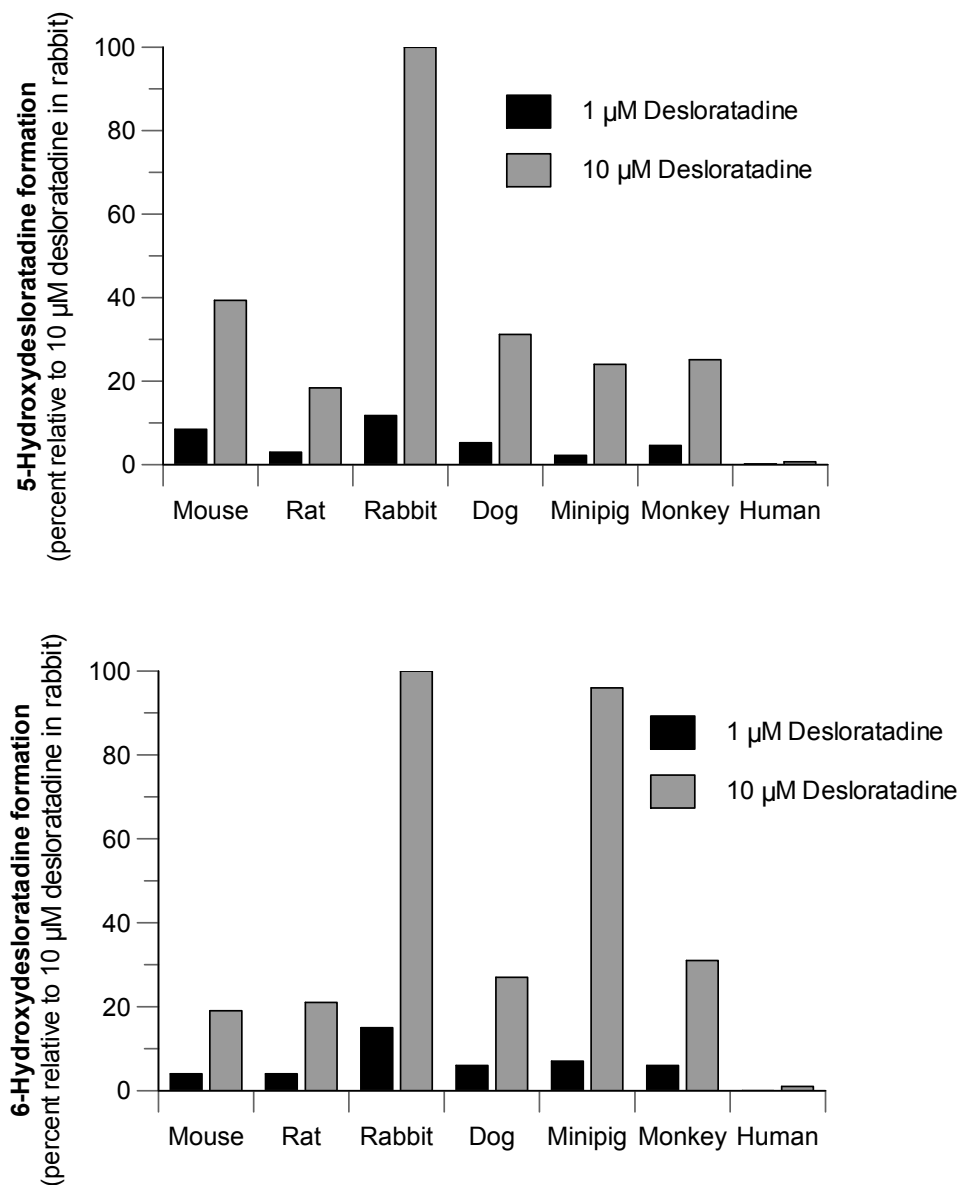

Pooled hepatocytes from mouse, rat, rabbit, dog, minipig, monkey and human were incubated at 1 million cells/mL with 1 or 10 μM desloratadine for 2 h. Analysis of 5- and 6-hydroxydesloratadine was conducted as described in *Materials and Methods*.

**Supplemental Figure 2: The effect of various P450 chemical inhibitors on 5-hydroxydesloratadine, 6-hydroxydesloratadine and 3-hydroxydesloratadine O-glucuronide formation in cryopreserved human hepatocytes (CHHs).**

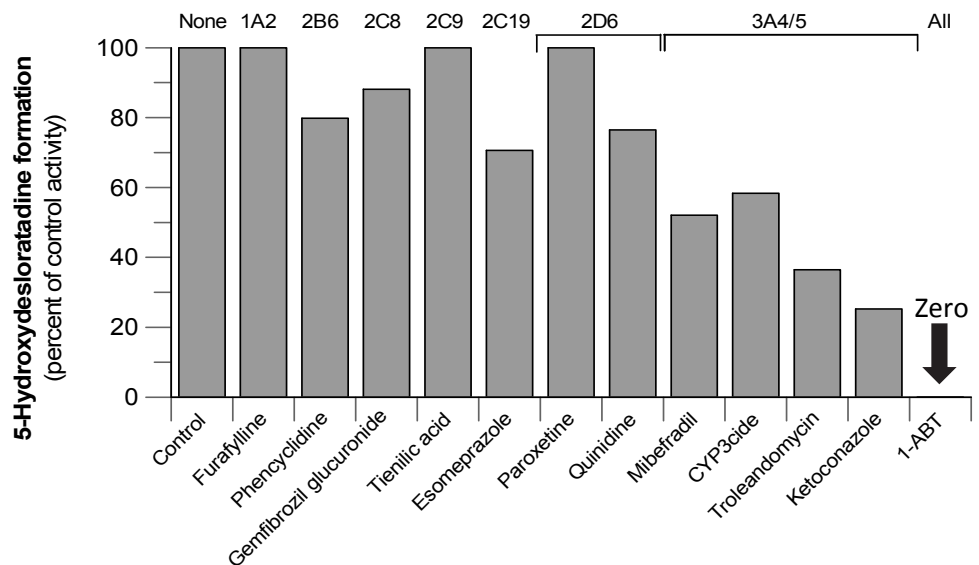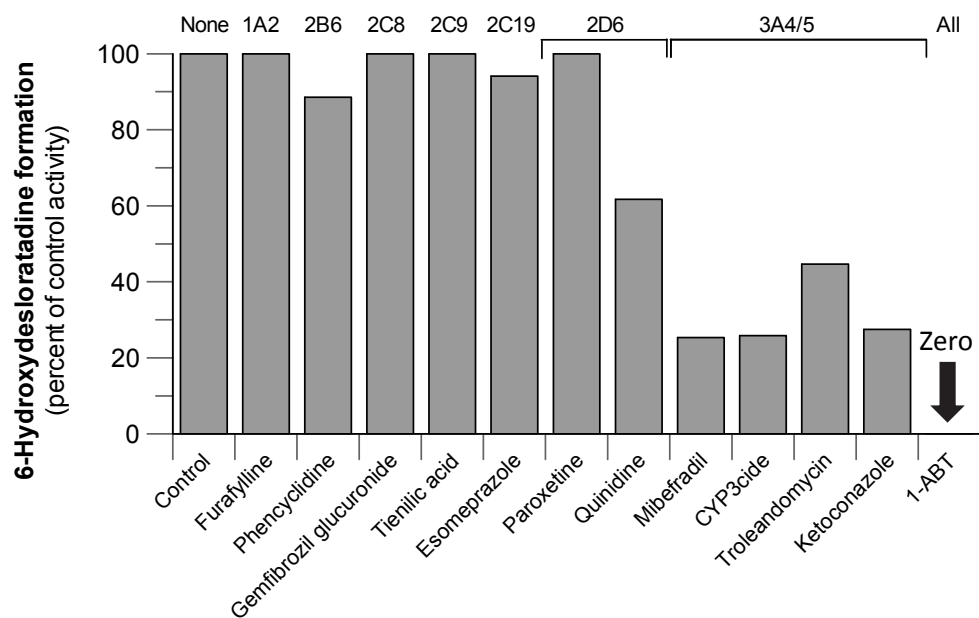

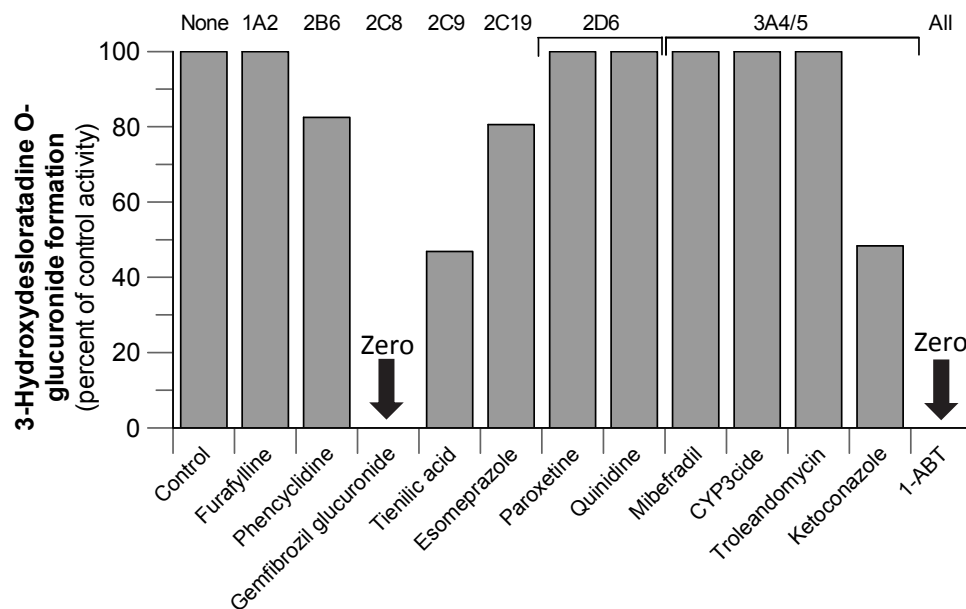

Various P450 chemical inhibitors were incubated with CHHs (1 million cells/mL) for 30 min prior to the addition of 10  $\mu$ M desloratadine followed by incubation for 2 h and analysis of 5-, 6-hydroxydesloratadine, and 3-hydroxydesloratadine O-glucuronide was conducted as described in *Materials and Methods*.

Supplemental Figure 3: Correlation of N-desalkylamodiaquine formation with 6 $\alpha$ -hydroxypaclitaxel formation in a panel of individual donor cryopreserved human hepatocytes (CHHs).

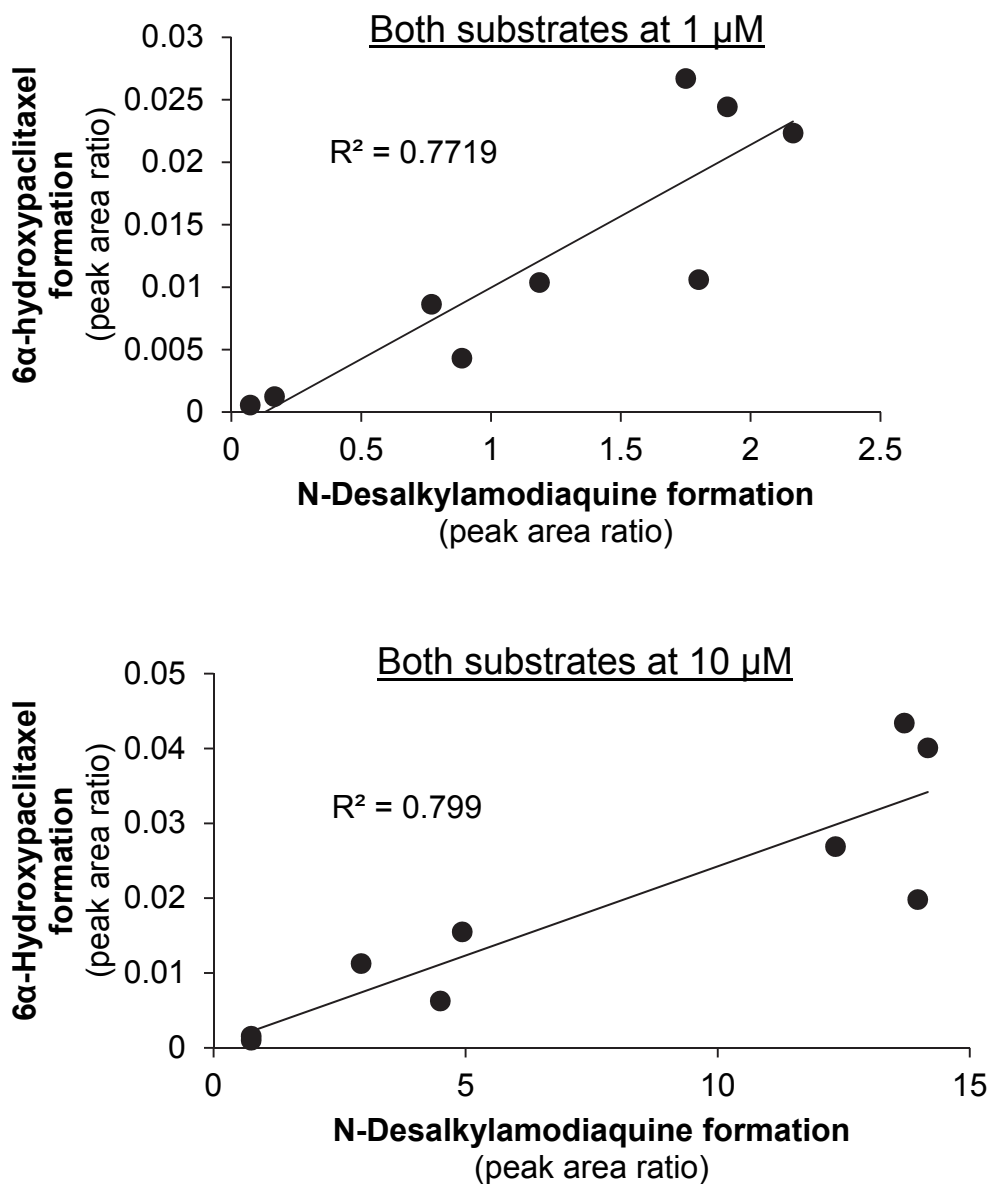

Individual donor CHHs were assessed for CYP2C8 activity with 1 and 10  $\mu$ M paclitaxel and amodiaquine as described in *Materials and Methods*.

Supplemental Figure 4: Time course of 3-hydroxydesloratadine formation in HLM (0.1 mg/mL) and HS9 (1 mg/mL) with or without NADPH and/or UDP-GlcUA.

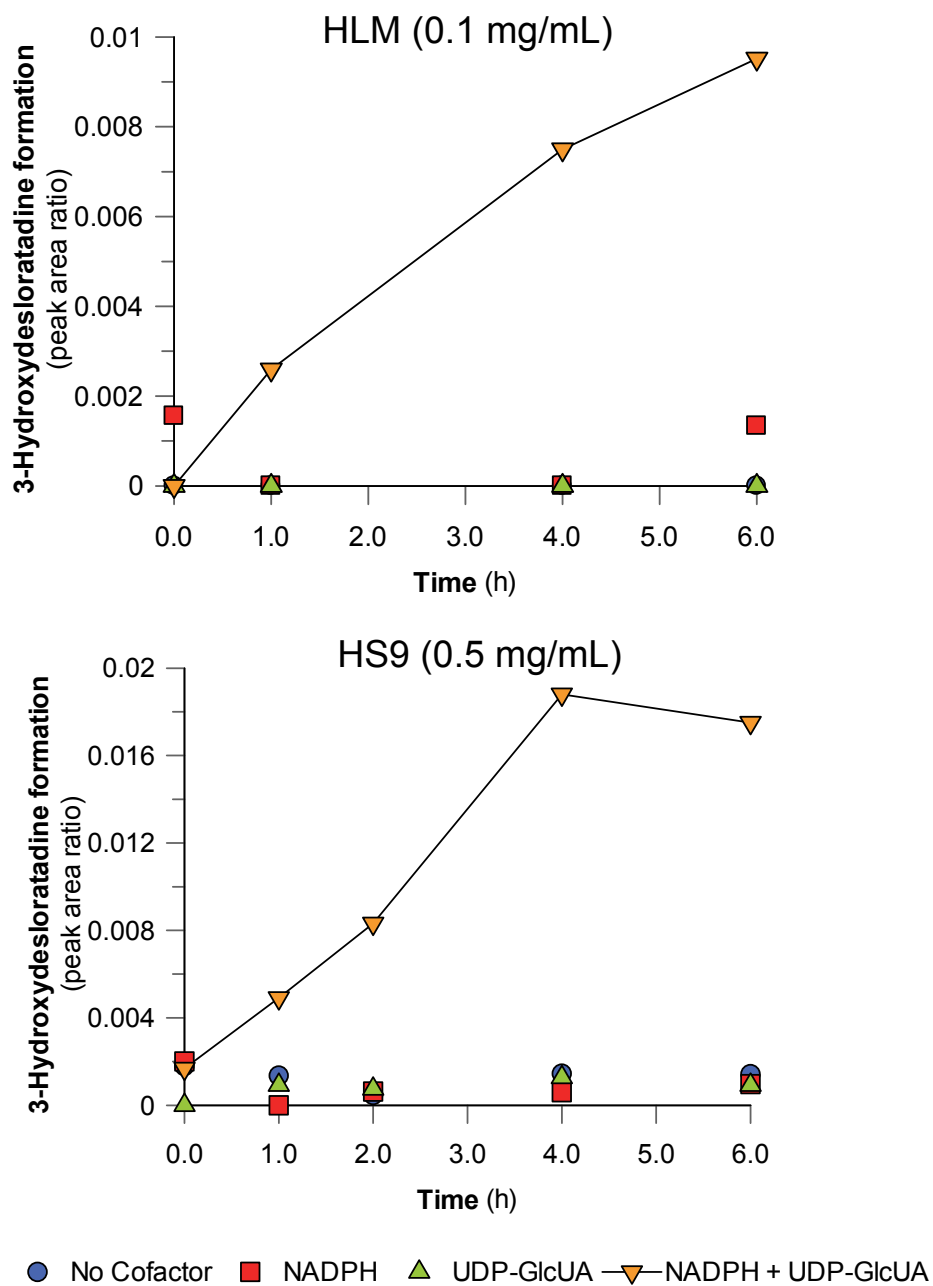

HLM (0.1 mg/mL) and HS9 (0.5 mg/mL) were incubated with 10  $\mu$ M in a time course up to 6 h with and without the addition of NADPH and/or UDP-GlcUA, as described in *Materials and Methods*.
